# Supplementary material for: Retrotransposon insertion as a novel mutational event in Bardet‐Biedl syndrome
Source: PubMed Central journal article supplement (PMC6393654; doi:10.1002/mgg3.521), 2018-11-28

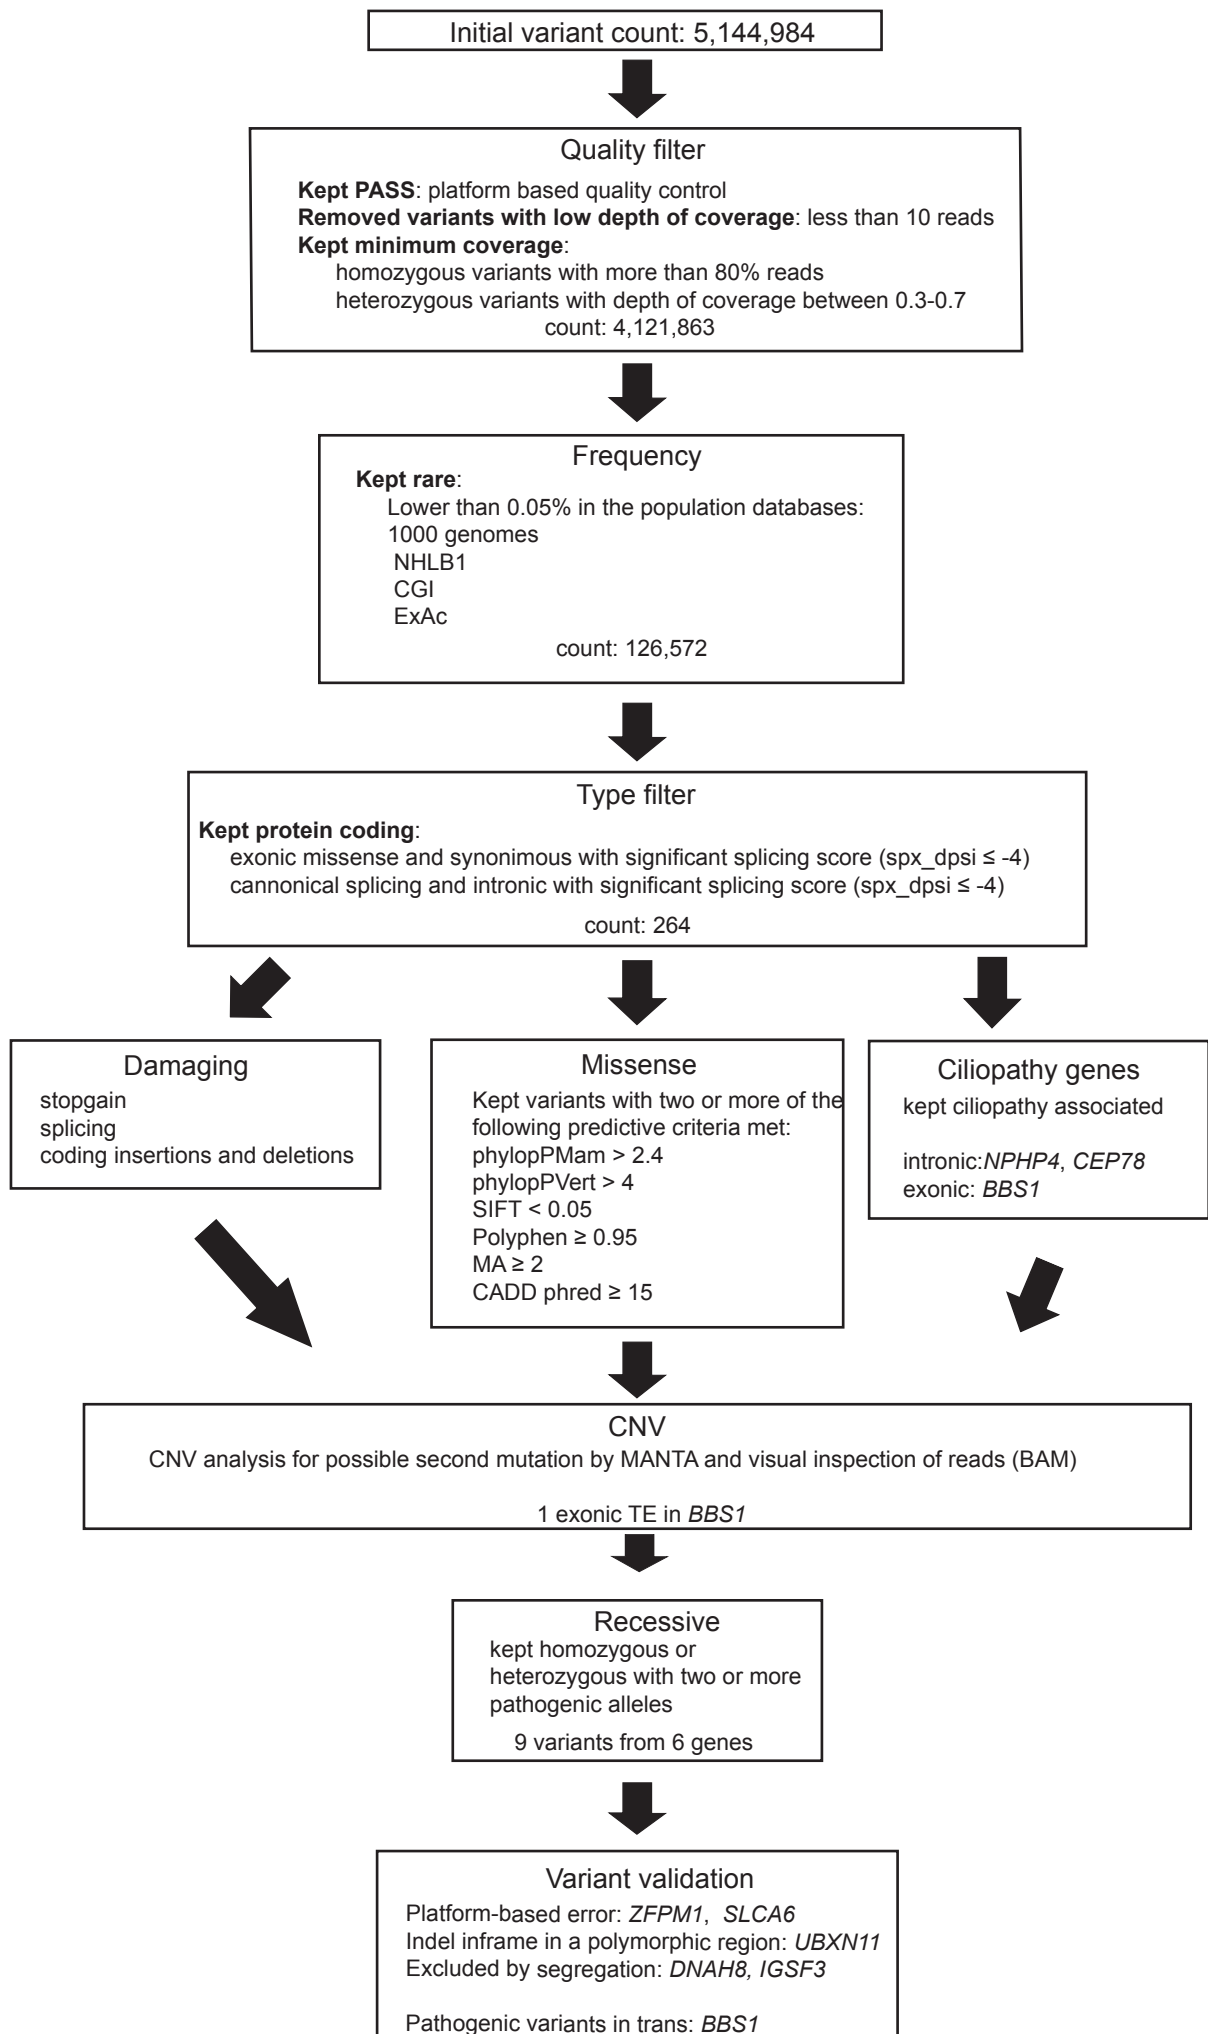

Supplement: MGG3-7-na-s002.pdf [file MGG3-7-na-s002.pdf]
