# Supplementary material for: Retrotransposon insertion as a novel mutational event in Bardet‐Biedl syndrome
Source: PubMed Central journal article supplement (PMC6393654; doi:10.1002/mgg3.521), 2018-11-28

**A**

|     |     |                                                              |     |
|-----|-----|--------------------------------------------------------------|-----|
| wt  | 1   | MAAASSSDSDACGAESNEANSKWLDAHYDPMANIHTFSACLALADLHGDGEYKLVVGDLG | 60  |
| mut | 1   | MAAASSSDSDACGAESNEANSKWLDAHYDPMANIHTFSACLALADLHGDGEYKLVVGDLG |     |
| wt  | 61  | PGGQQPRLKVLKGPLVMTESPLPALPAAAATFLMEQHEPRTPALALASGPCVYVYKNLRP | 120 |
| mut | 61  | PGGQQPRLKVLKGPLVMTESPLPALPAAAATFLMEQHEPRTPALALASGPCVYVYKNLRP |     |
| wt  | 121 | YFKFSLPQLPPNPLEQDLWNQAKEDRIDPLTLKEMLESIRETAEPLSIQSLRFLQLELS  | 180 |
| mut | 121 | YFKFSLPQLPPNPLEQDLWNQAKEDRIDPLTLKEMLESIRETAEPLSIQSLRFLQLELS  |     |
| wt  | 181 | EMAEFVNQHKSNSIKRQTVITMTTLKKNLADEDAVSVLGTENKELLVLDPEAFTILA    | 240 |
| mut | 181 | EMAEFVNQHKSNSIKRQTVITMTTLKKNLADEDAVSVLGTENKELLVLDPEAFTILA    |     |
| wt  | 241 | KMSLPSVPVFLVSGQFDVEFRLAAACRNGNIYILRRDSKHPKYCIELSAQPVGLIRVHK  | 300 |
| mut | 241 | KMSLPSVPVFLVSGQFDVEFRLAAACRNGNIYILRRDSKHPKYCIELSAQPVGLIRVHK  |     |
| wt  | 301 | VLVVGSTQDSLHGFTHKGKKLWTVQMPAAILTMNLEQHSRGLQAVMAGLANGEVRIYRD  | 360 |
| mut | 301 | VLVVGSTQDSLHGFTHKGKKLWTVQMPAAILTMNLEQHSRGLQAVMAGLANGEVRIYRD  | 360 |
| wt  | 361 | KALLNVIHTPDAVTSLCFGRYGREDNTLIMTTRGGGLIKILKRTAVFVEGGSEVGPPPA  | 420 |
| mut | 361 | KALLNVIHTPDAVTSLCFGRYGREDNTLIMTTRGGGLIKILKRTQCSMVPRLCESGVIS  | 420 |
| wt  | 421 | QAMKLNVPKTRLYVDQTLREREAGTAMHRAFQTDLYLLRLRAARAYLQALESSLSPLST  | 480 |
| mut | 421 | AHYNLHLPAACLGLPKCRDCSLCPAATPSGK-----                         | 451 |
| wt  | 481 | TAREPLKLHAVVQGLGPTFKLTLHLQNTSTTRPVLGLLVCFLYNEALYSLPRAFFKVPLL | 540 |
| mut | 481 | -----                                                        |     |
| wt  | 541 | VPGLNYPLETFVESLSNKGISDIKVLVLRREGQSAPLLSAHVNMPPGSEGLAAA-----  | 593 |
| mut | 541 | -----                                                        |     |

**B**

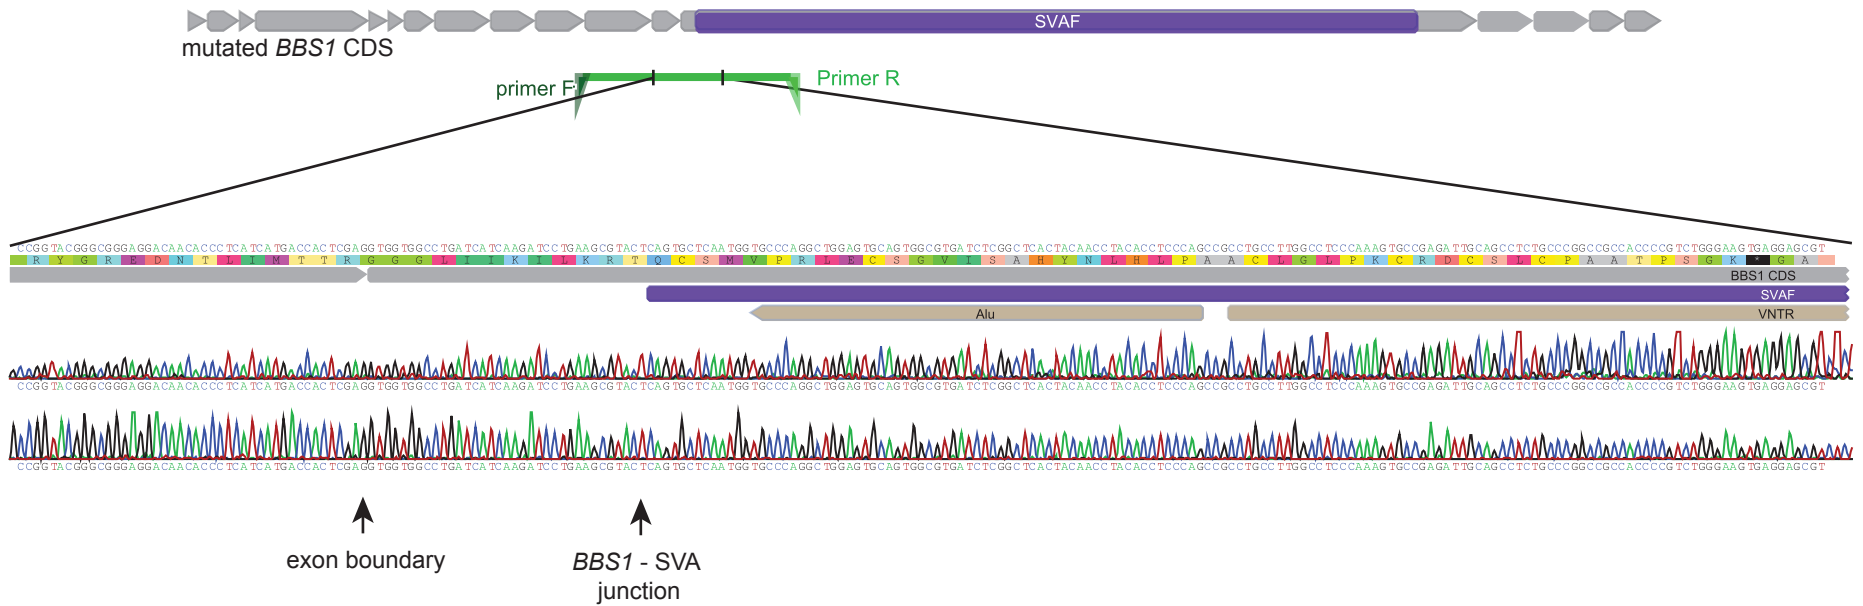

Supplement: MGG3-7-na-s004.pdf [file MGG3-7-na-s004.pdf]
